# Supplementary material
Source: Springer Nature journal article supplement (https://www.springermedizin.de/resource/supplementary/13054_2011_9570_MOESM4_ESM.pdf/9706482)

# Pneumonia

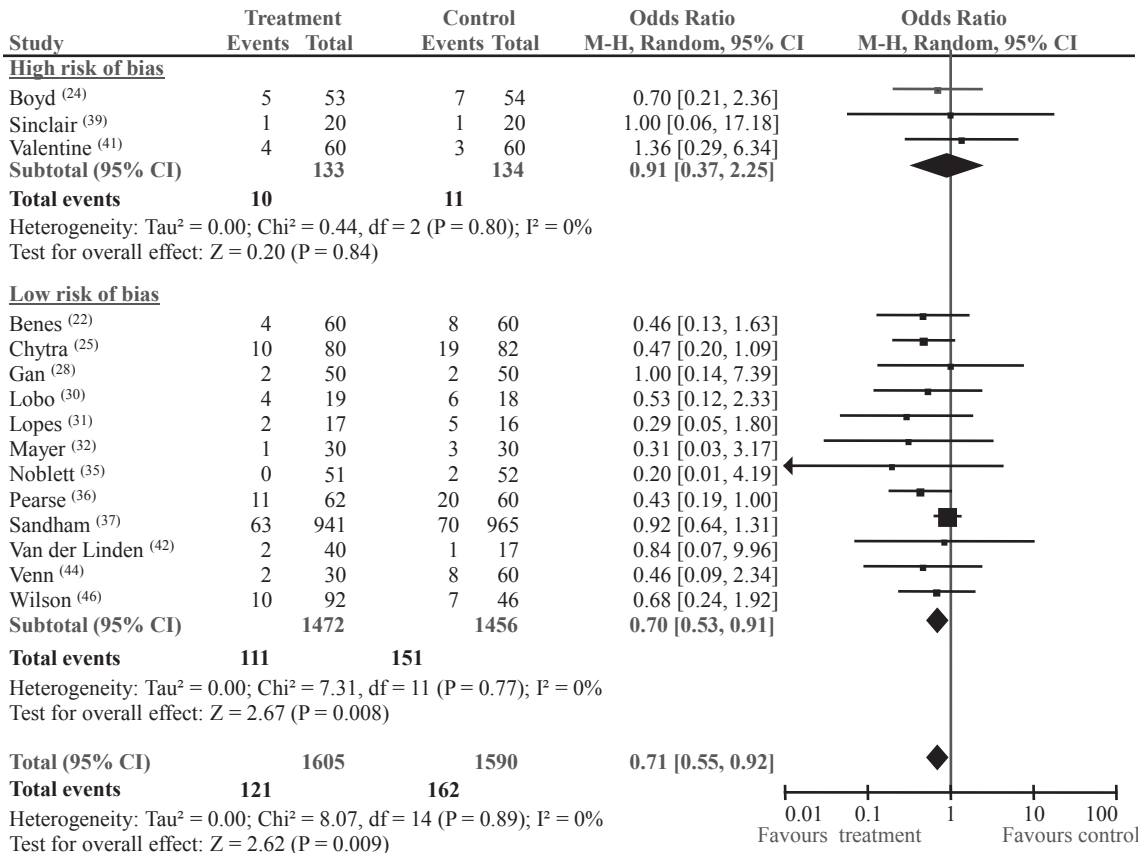

0.01 0.1 1 10 100  
Favours treatment Favours control

Supplement: MOESM4 [file 9706482]
